# Supplementary material for: Dual applications of silver nanoparticles incorporated functionalized MWCNTs grafted surface modified PAN nanofibrous membrane for water purification
Source: Royal Society of Chemistry journal article supplement (doi:10.1039/c6ra22735j), 2016-01-01
Supplement: c6ra22735j2.pdf [file c6ra22735j2.pdf]

## **SUPPLEMENTARY INFORMATION**

### **Dual applications of silver nanoparticles incorporated functionalized MWCNTs grafted surface modified PAN nanofibrous membrane for water purification**

*S.Raj Kumar <sup>a</sup> and P. Gopinath <sup>\*a,b</sup>*

*<sup>a</sup>Nanobiotechnology Laboratory, Centre for Nanotechnology,*

*<sup>b</sup>Department of Biotechnology,*

Indian Institute of Technology Roorkee, Roorkee, Uttarakhand-247667, India.

Corresponding author: Tel. +91-1332-285650; Fax. +91-1332-273560;

\*E.mail: [pgopifnt@iitr.ernet.in](mailto:pgopifnt@iitr.ernet.in); [genegopi@gmail.com](mailto:genegopi@gmail.com)

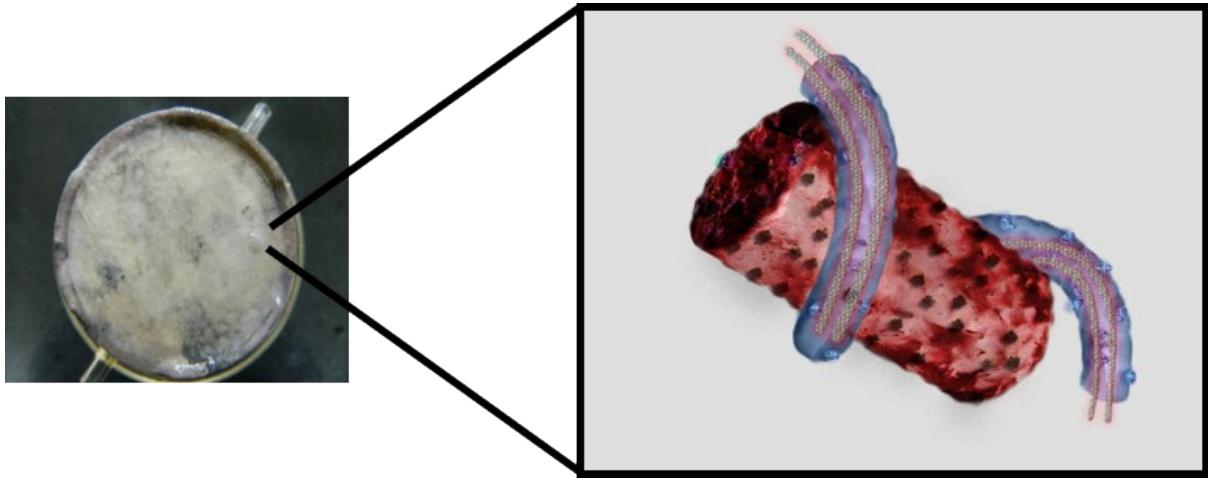

**Fig.S1** 3D pattern of nanofibrous membrane

| <b>Sample</b>                                                             | <b>temperature at 1<sup>st</sup><br/>decomposition occurs<br/>(°C)</b> | <b>residual matter<br/>at 800°C (%)</b> | <b>temperature at<br/>maximum weight<br/>loss<br/>rate (°C)</b> |
|---------------------------------------------------------------------------|------------------------------------------------------------------------|-----------------------------------------|-----------------------------------------------------------------|
| <b>Pristine PAN</b>                                                       | 320                                                                    | <1                                      | 730                                                             |
| <b>Aminated PAN</b>                                                       | 220                                                                    | 32                                      | 730                                                             |
| <b>Aminated PAN/Ag-<br/>PEGylated MWCNT-COOH<br/>nanofibrous membrane</b> | 215                                                                    | 49                                      | 700                                                             |

**Table.S1** Thermal analysis of PAN, Aminated PAN and nanofibrous membrane

| <b>Samples</b>              | <b>Elastic modulus (Mpa)</b> | <b>UTS (Mpa)</b> | <b>Strain failure (%)</b> |
|-----------------------------|------------------------------|------------------|---------------------------|
| <b>PAN nanofiber</b>        | 0.1607                       | 1.6              | 57.8                      |
| <b>Nanofibrous Membrane</b> | 0.2494                       | 2.344            | 57.5                      |

**Table.S2** Mechanical properties of as spun PAN nanofiber and the nanofibrous membrane

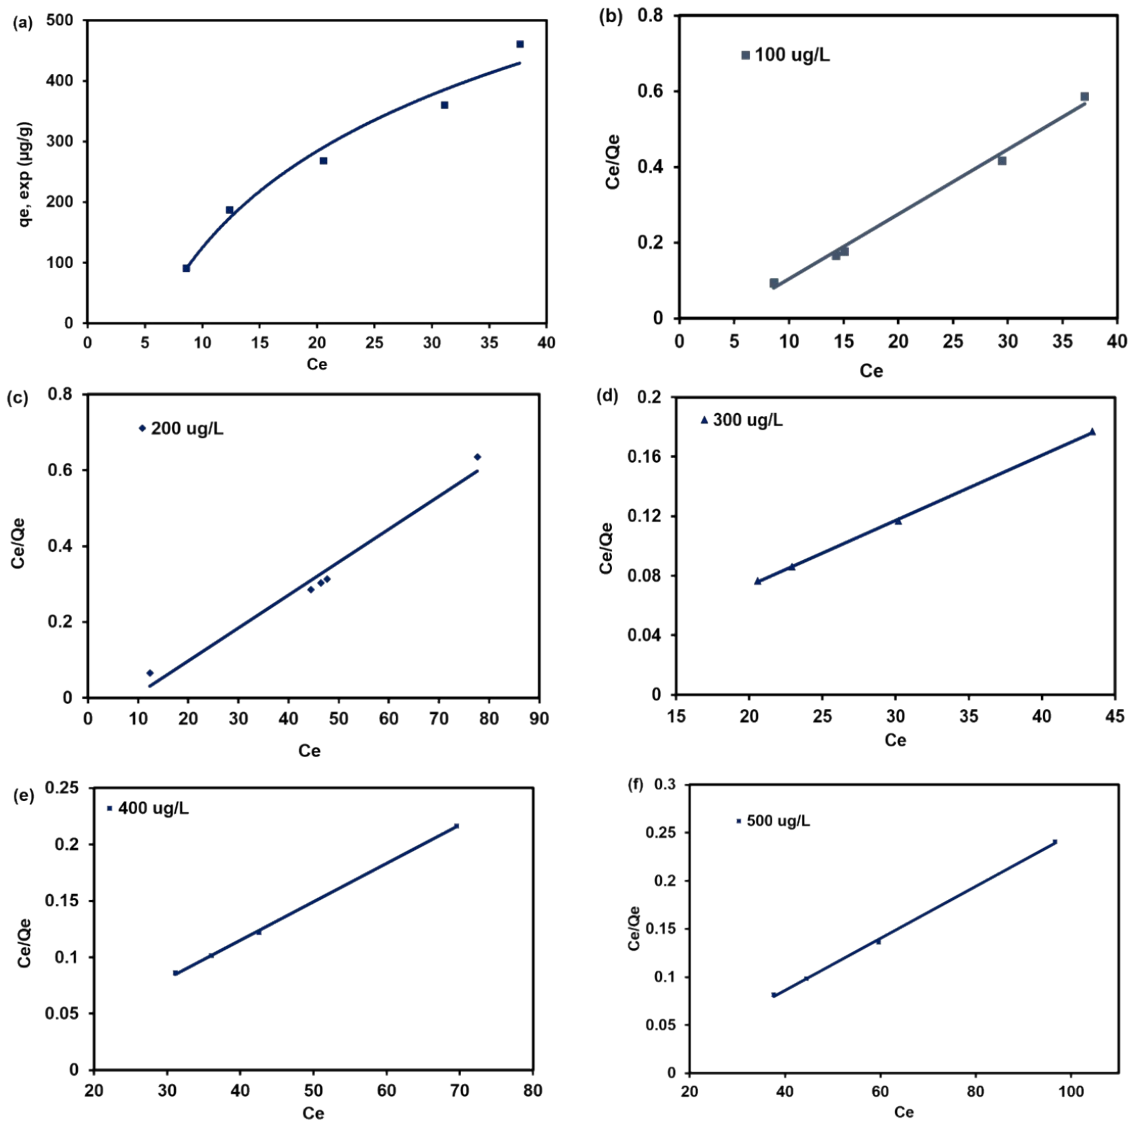

**Fig.S2** (a) Adsorption isotherm and (b-f) Langmuir isotherm plot

| Adsorbent                      | Concentrations<br>( $\mu\text{g/L}$ ) | Langmuir model               |       |        |
|--------------------------------|---------------------------------------|------------------------------|-------|--------|
|                                |                                       | $Q_m$<br>( $\mu\text{g/g}$ ) | $K_L$ | $r^2$  |
| Aminated PAN nanofiber<br>mats | 100                                   | 58.47                        | 3.85  | 0.9925 |
|                                | 200                                   | 114.94                       | 8.74  | 0.9737 |
|                                | 289                                   | 227.27                       | 3.31  | 0.9995 |
|                                | 391.02                                | 294.11                       | 6.14  | 0.9994 |
|                                | 498.34                                | 370.37                       | 8.29  | 0.9989 |

**Table.S3** Values of parameters associated with the Langmuir isotherm model, including the correlation coefficient for the adsorption of As(III) on the aminated PAN nanofibers (APAN)

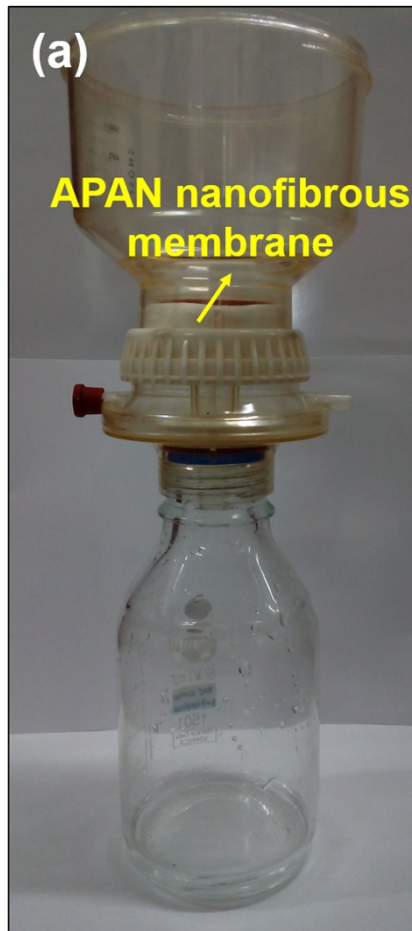

**Fig.S3** (a) Experimental setup of filtration unit

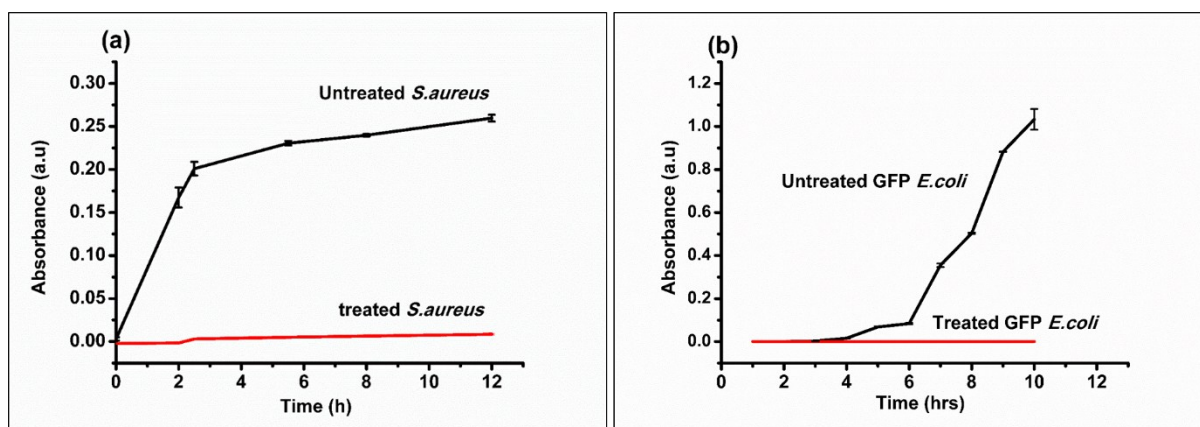

**Fig.S4** UV-visible absorption spectra of time dependent antibacterial study of nanofibrous membrane against (a) *S.aureus* (b) GFP *E.coli*



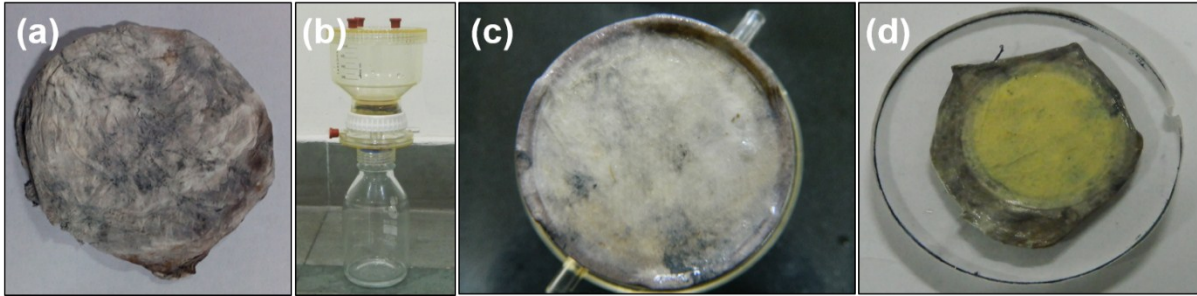

**Fig.S5** Concatenate events of bacterial filtration study (a) membrane before filtration (b) filtration setup (c) after cycle1 in wet condition due to washing (d) after 3cycles

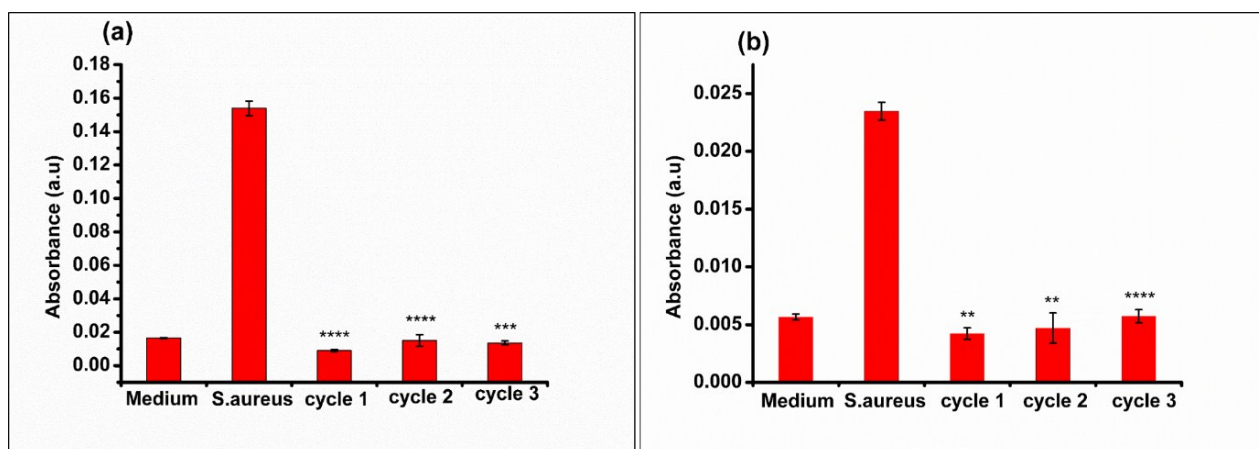

**Fig.S6** Antibacterial study of nanofibrous membrane by optical density analysis (a) NB medium and (b) Dextrose medium

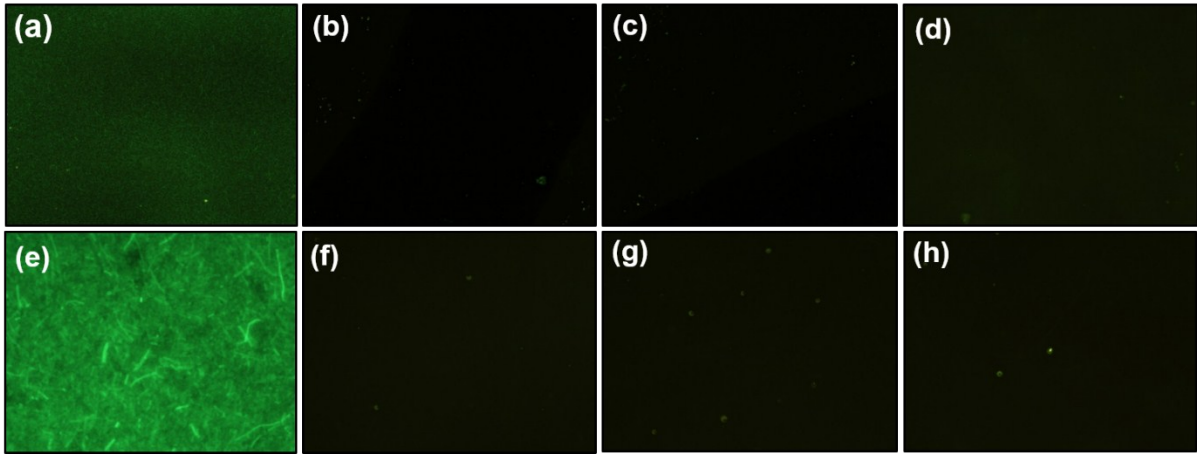

**Fig.S7** Fluorescence microscopy analysis of filtration study of GFP *E.coli* with different media (a-d) Dextrose and (e-h) Luria Bertani

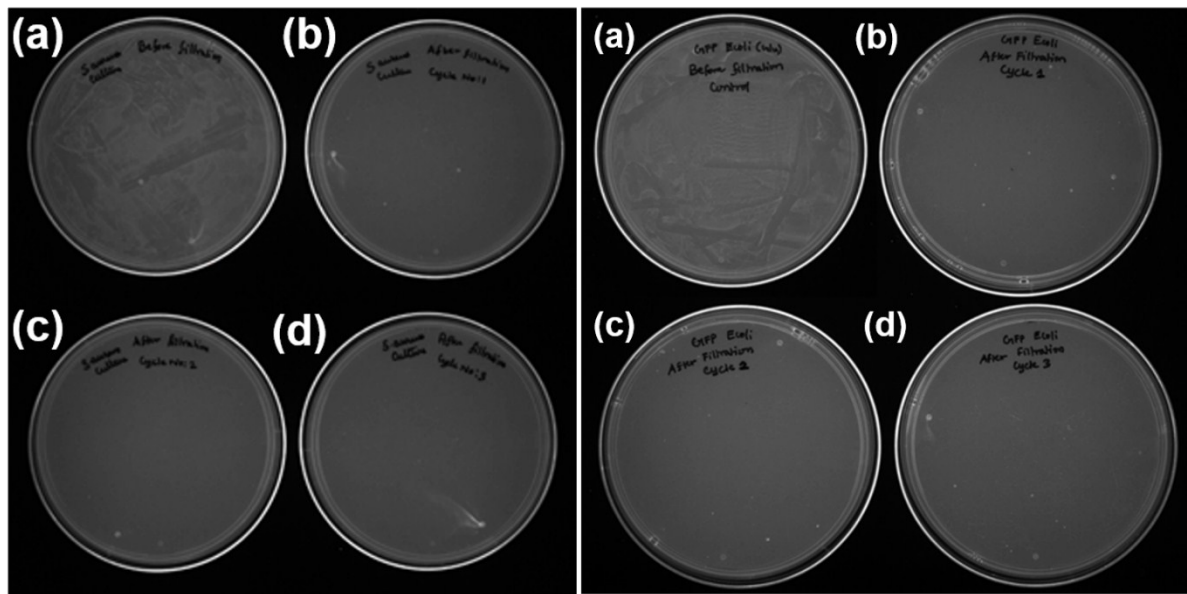

**Fig.S8** Antibacterial studies of nanofibrous membrane treated bacteria by colony counting method against *S.aureus* and GFP *E.coli*

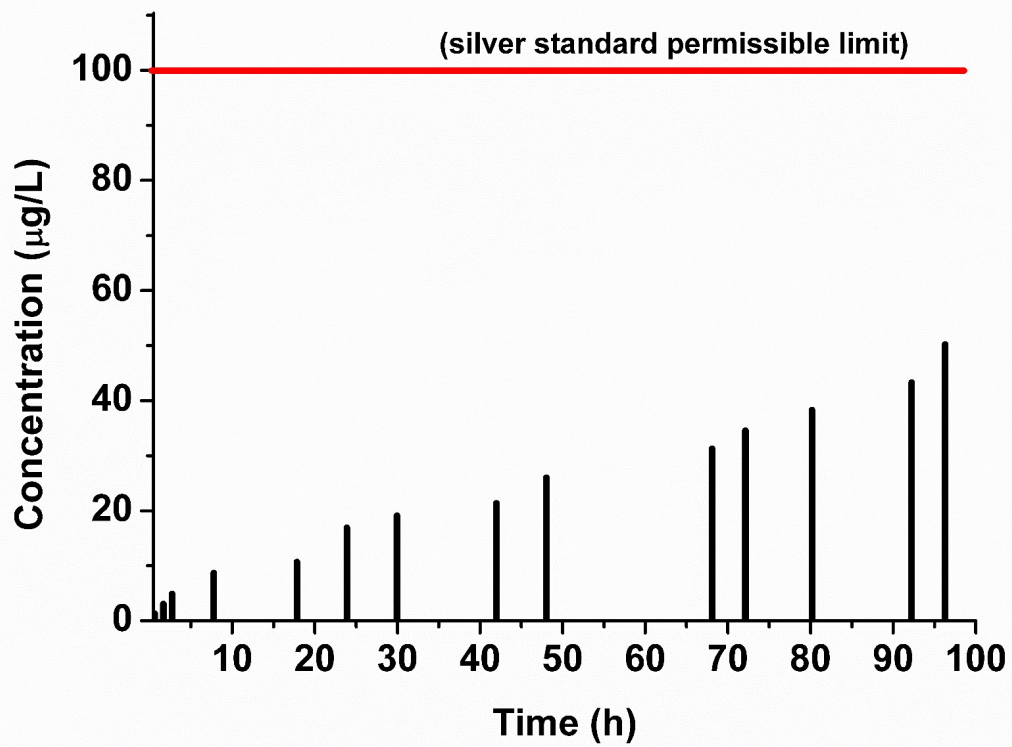

**Fig.S9** Cumulative release study of silver ions from the nanofibrous membrane
